# Supplementary material for: Deciphering the Role and Signaling Pathways of PKCα in Luminal A Breast Cancer Cells
Source: MDPI journal article supplement (doi:10.3390/ijms232214023), 2022-11-14
Supplement: s1 [file s1]

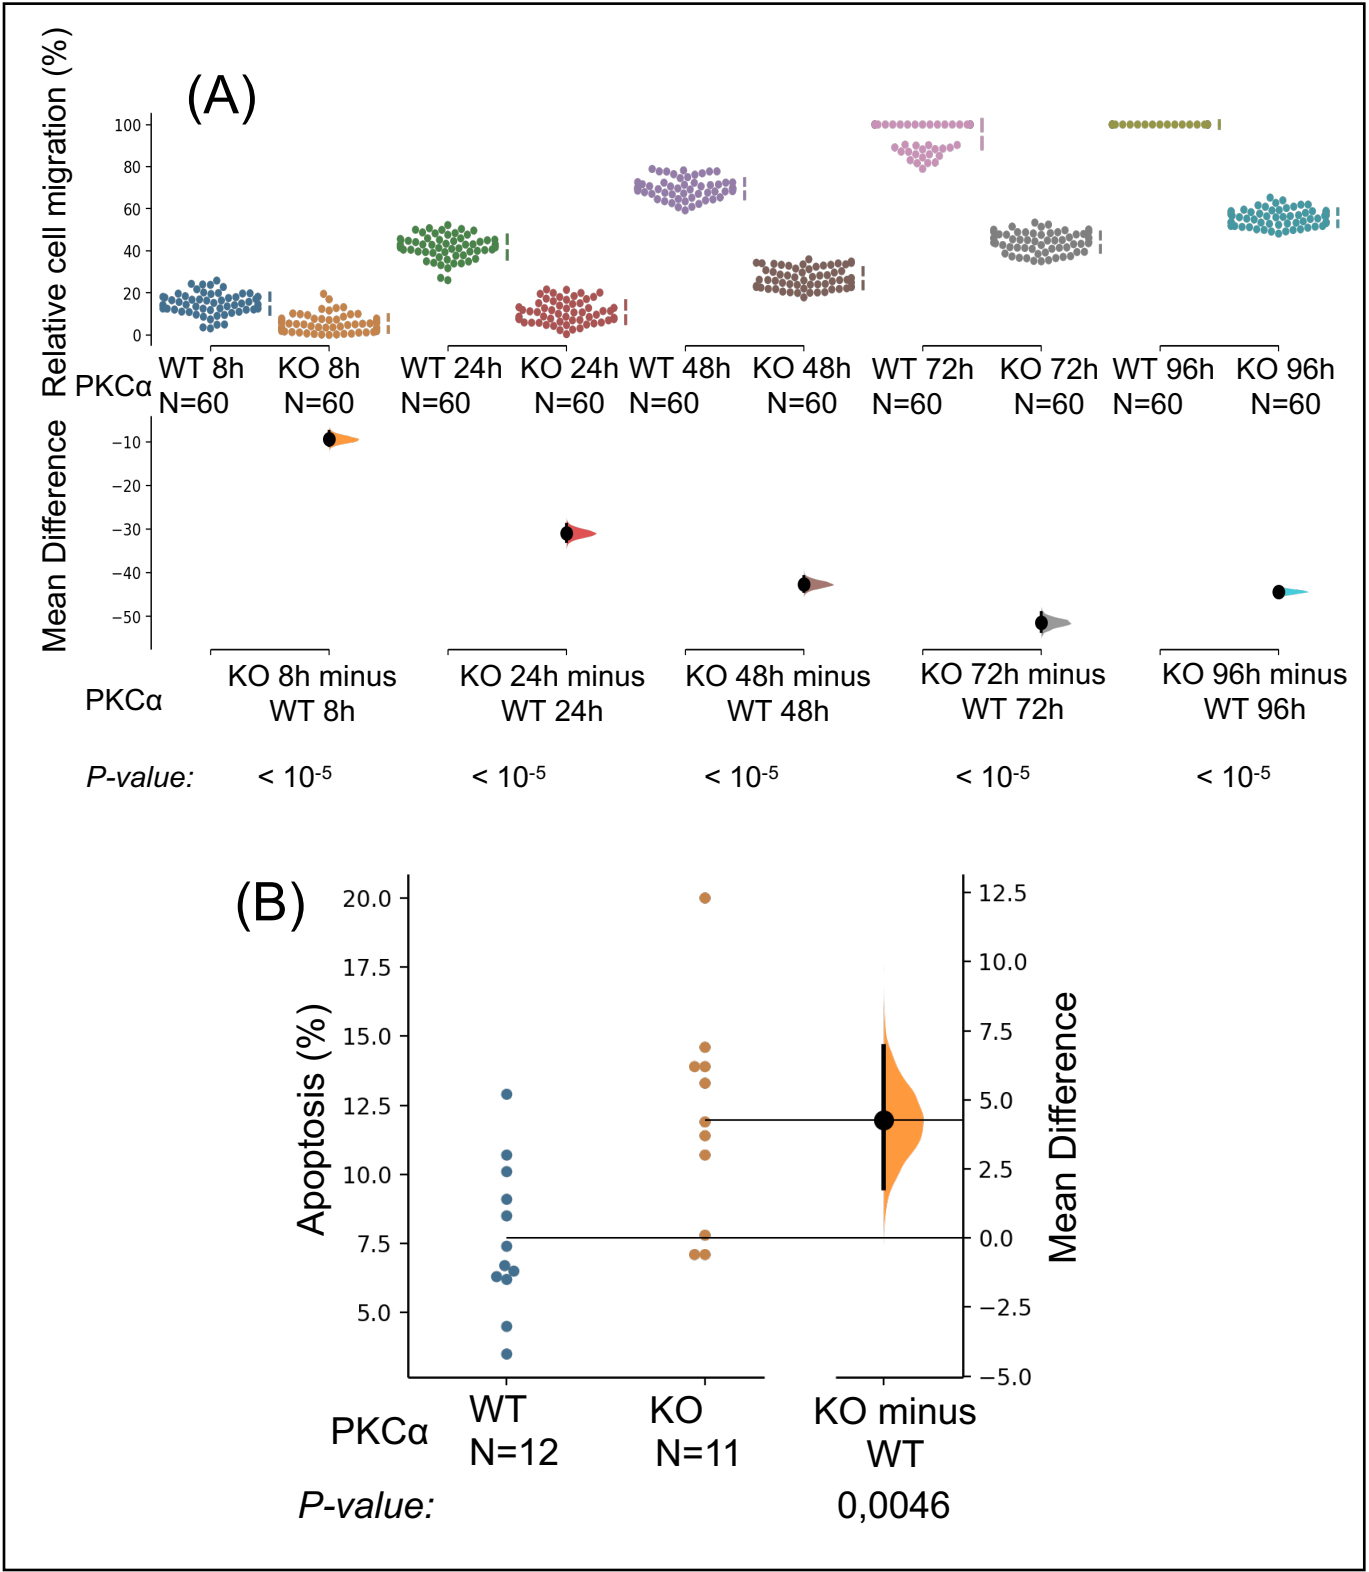

**Figure S1. Knock-down of PKC $\alpha$  in MCF-7 cells decreases their migration rate and slightly increases apoptosis.** (A) Relative cell migration of MCF-7 PKC $\alpha$ -WT and PKC $\alpha$ -KO cells was measured by wound healing assay for 96 h. The mean difference for comparisons against the PKC $\alpha$ -KO vs PKC $\alpha$ -WT cells are shown in the Cumming estimation plots. The raw data are plotted on the upper axis. On the lower axis, mean differences are plotted as bootstrap sampling distributions (5000). Each mean difference is depicted as a dot. Each 95% confidence interval is indicated by the ends of the vertical error bars. Additional permutation test was also applied to confirm these results, the P values to accept/reject the null hypothesis of no differences between PKC $\alpha$ -WT and PKC $\alpha$ -KO cells are indicated below each comparison (CI 95%). (B) Percentage of apoptosis was measured for the two cell types and the same statistical analysis than (A) was applied, mean difference is plotted on the right size.

(A)

PKC $\alpha$ -WT MCF-7PKC $\alpha$ -KD MCF-7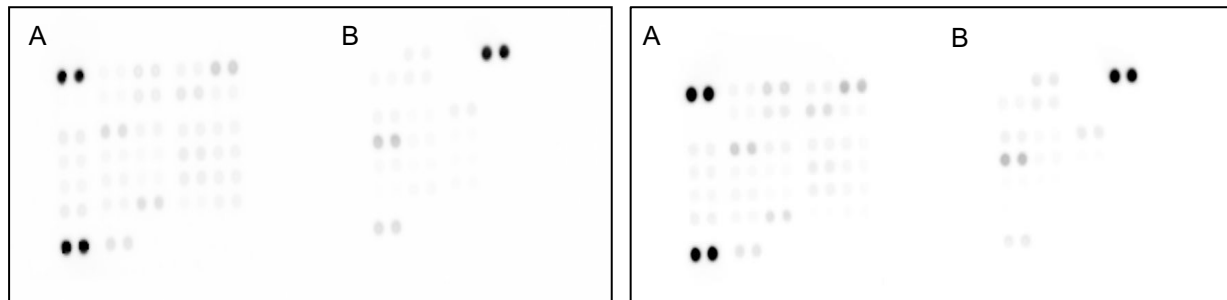

(B)

Human Phospho-Kinase Array Coordinates

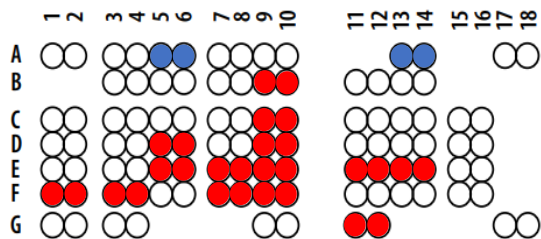

(C)

| Target    | Phosphorylation Site   | Membrane/Coordinate |
|-----------|------------------------|---------------------|
| p53       | S392                   | B-A13, A14          |
| ERK1/2    | T202/Y204<br>T185/Y187 | A-A5, A6            |
| AKT 1/2/3 | S473                   | A-B9, B10           |
| β-catenin | -----                  | A-C9, C10           |
| Lck       | Y394                   | A-D5, D6            |
| STAT5A    | Y694                   | A-D9, D10           |
| Fgr       | Y412                   | A-E5, E6            |
| STAT6     | Y641                   | A-E7, E8            |
| STAT5B    | Y699                   | A-E9, E10           |
| STAT3     | Y705                   | B-E11, E12          |
| P27       | T198                   | B-E13, E14          |
| HSP60     | -----                  | B-G11, G12          |
| Hck       | Y411                   | A-F1, F2            |
| Chk-2     | T68                    | A-F3, F4            |
| PDGF-rb   | Y751                   | A-F7, F8            |
| STAT5A/B  | Y694/Y699              | A-F9, F10           |

(D)

| Target         | Control          | Membrane/<br>Coordinate |
|----------------|------------------|-------------------------|
| Reference Spot | Positive control | A-G1, G2                |
| PBS            | Negative Control | A-G9, G10               |
|                |                  |                         |
| Reference Spot | Positive control | B-A17, A18              |
| PBS            | Negative Control | B-G17, G18              |

**Figure S2.** The relative levels of protein phosphorylation were determined by proteome profiler human phospho-kinase array kit (Cat#: ARY003B, R&D Systems, Minnesota, USA). MCF-7 PKC $\alpha$ -KD were compared versus PKC $\alpha$ -WT cell lysates. (A) WB membranes of the phospho-kinase array. (B) Normalized quantification comparing PKC $\alpha$ -KD (sample) versus PKC $\alpha$ -WT (control). Red dots represent phosphorylated proteins showing a decrease in their phosphorylation levels whereas blue dots are showing an increase. (C) Kinase identification with the phosphorylation sites identified by the Ab used in the kit. D) Each membrane includes its own spots that function as positive control (reference spot) and negative control (PBS). Note that each kinase is tested in two independent spots. Only one biological sample was used in this assay.

**Table S1. RT-qPCR validation of microarray data**

|                          | GAPDH  | SPAM1 | PRKCA  | ERBB4  | PRKA2B | PLCB4  | PDGFA  | EGFR   | CSTA   | ITGB6  |
|--------------------------|--------|-------|--------|--------|--------|--------|--------|--------|--------|--------|
| Ratio                    | 0.994  | 1.006 | 0.157  | 0.720  | 1.185  | 0.911  | 0.859  | 0.425  | 0.253  | 0.454  |
| SD                       | 0.001  | 0.001 | 0.006  | 0.076  | 0.172  | 0.076  | 0.272  | 0.021  | 0.012  | 0.003  |
| CV (%)                   | 0.142  | 0.141 | 4.066  | 10.516 | 14.506 | 8.383  | 31.711 | 4.991  | 4.761  | 0.623  |
| Log2 Ratio               | -0.009 | 0.009 | -2.676 | -0.475 | 0.244  | -0.134 | -0.220 | -1.234 | -1.986 | -1.139 |
| Microarray<br>Log2 ratio |        | 0,06  | -3,5   | 1,6    | 1,59   | 1,94   | 1,74   | -2,14  | 3,34   | -3,79  |

**Table S2a. The top eleven gene enrichment functions downregulated after PKC $\alpha$  inhibition.**

| Description                                          | Term          | Log10 p-value | Genes                                                                                                                                                                                                                                                                                                                                                                                                                                                                                   |
|------------------------------------------------------|---------------|---------------|-----------------------------------------------------------------------------------------------------------------------------------------------------------------------------------------------------------------------------------------------------------------------------------------------------------------------------------------------------------------------------------------------------------------------------------------------------------------------------------------|
| Interferon Signaling                                 | R-HSA-913531  | -31,9779      | <i>BST2, IFI6, GBP1, HLA-A, HLA-B, HLA-C, HLA-F, IFI35, IFIT3, MID1, MT2A, MX1, MX2, OAS1, OAS2, OAS3, PSMB8, STAT1, IFITM1, OASL, UBE2L6, ISG15, TRIM22, IFI30, USP18, TRIM2, SAMHD1, HERC5, XAF1, TRIM5, RSAD2, ANXA1, BCL6, CD36, DUSP6, GRB10, CXCL8, IL15, PIK3R2, PSMB9, SOX2, H3C1, BCL2L11, ITGB6, FOSL1, NMI, IFI44, IFI44L, SHFL, RTP4, ARG2, PPARG, S100A7, S100A8, S100A9, SLPI, KYNU, H2BC11, LY6E, LAMP3, TMPRSS4, ZFP36L1, ZFP36L2, KLF5, EREG, MT1X, PRKCA, SCGB1A1</i> |
| Regulation of response to biotic stimulus            | GO:0002831    | -12,1094      | <i>ARG2, CD36, EREG, HLA-A, HLA-B, HLA-F, IFI35, IL15, OAS1, OAS3, PPARG, PRKCA, STAT1, OASL, NMI, ISG15, USP18, SAMHD1, HERC5, TRIM5, ANXA1, BCL6, ITGA2, MDK, S100A8, S100A9, SCGB1A1, PTGES, BST2, GBP1, GAL, CAV1, H2BC11, TFPI, SEMA3E</i>                                                                                                                                                                                                                                         |
| Antiviral mechanism by IFN-stimulated genes          | R-HSA-1169410 | -10,9912      | <i>MX1, MX2, OAS1, OAS2, OAS3, STAT1, OASL, UBE2L6, ISG15, USP18, HERC5, BID, CXCL8, PIK3R2, PRKCA, TNFSF10, TMPRSS4, RSAD2, EGFR, NMI, ARG2, GBP1, SNAI2, CD36, IFI6</i>                                                                                                                                                                                                                                                                                                               |
| Negative regulation of cell population proliferation | GO:0008285    | -10,2469      | <i>ADM, ARG2, BCL6, CAV1, EREG, IFI35, IFIT3, IGFBP3, CXCL8, IL15, KRT4, PPARG, PLAAT4, SNAI2, SOX2, STAT1, SCGB1A1, FOSL1, H2AC4, IFITM1, PLPP1, NMI, PTGES, IFI30, SULF1, GAL</i>                                                                                                                                                                                                                                                                                                     |
| Immune response to tuberculosis                      | WP4197        | -9,78627      | <i>IFI35, IFIT3, MX1, OAS1, PSMB8, STAT1, IFITM1, OAS2, OASL, BID, BST2, CTSZ, IFI6, IGFBP3, CXCL8, LGALS3BP, TNFSF10, IFI44L, ISG15, SHFL, XAF1, GBP1, KYNU, NMI, EREG, IL15</i>                                                                                                                                                                                                                                                                                                       |
| Regulation of peptidase activity                     | GO:0052547    | -9,20569      | <i>BID, BST2, CAV1, IFI6, SERPINB5, PPARG, PSMB8, PSMB9, S100A8, S100A9, SLPI, SOX2, TFPI, TP63, TNFSF10, BCL2L11, TNFAIP8, LAMP3, ANXA8, ADM, ALDH1A3, ANXA1, BCL6, DUSP6, IGFBP3, TGM2, FOSL1, GAL, SIK1, CD36, CTSZ, TRIB2, AURKAIP1, BDNF, SNAI2, EGFR, FTL, STAT1, H2AC4, H2AC11, ITGA2, RGS16, PIK3R2, PRKCA, SIVA1, SGCG</i>                                                                                                                                                     |
| ER-Phagosome pathway                                 | R-HSA-1236974 | -9,10545      | <i>CD36, HLA-A, HLA-B, HLA-C, HLA-F, PSMB8, PSMB9, S100A8, S100A9, TAP2, BID, OAS1, OAS2, OAS3, PIK3R2, STAT1, ISG15, BCL2L11, COL4A5, COL4A6, EGFR, ITGA2, ITGB6, MX1, MX2, OASL, BST2, CAV1, IFI30, PRKCA, SAMHD1, CALML5, TRIM5, ZFP36L1, ZFP36L2, IGFBP3, CXCL8, SGCG, H2AC4, H2BC5, RANBP1, H2BC9, H2BC17, H2BC11, UBE2L6, HERC5, HERC6, COL5A1, BCL6, SLC7A5, RSAD2, IFITM1, BTN3A2, DNM3, TNFSF10, ANXA1, IL15, FOSL1</i>                                                        |
| Response to wounding                                 | GO:0009611    | -8,77802      | <i>ADM, ZFP36L1, ZFP36L2, CD36, COL5A1, ELK3, EREG, ITGA2, ITGB6, KRT6A, MDK, S100A8, SOX2, TFPI, SLC7A11, FLRT3, TMPRSS4, ANXA8, AQP3, CAV1, OAS2, TP63</i>                                                                                                                                                                                                                                                                                                                            |
| Non-genomic actions of 1,25 dihydroxyvitamin D3      | WP4341        | -8,76795      | <i>CAV1, CYP24A1, CXCL8, OAS2, PRKCA, STAT1, ISG15, IFI44L, RSAD2, IFI6, GBP1, HLA-B, OAS1, PSMB9, ZFP36L1</i>                                                                                                                                                                                                                                                                                                                                                                          |
| Modulation by symbiont of entry into host            | GO:0052372    | -8,68431      | <i>CAV1, CXCL8, KRT6A, LY6E, IFITM1, TRIM22, TMPRSS4, TRIM5, BST2</i>                                                                                                                                                                                                                                                                                                                                                                                                                   |
| Signaling by Receptor Tyrosine Kinases               | R-HSA-9006934 | -8,25744      | <i>BDNF, BTC, CAV1, COL4A5, COL5A1, DUSP6, EGFR, EREG, GRB10, ID1, ITGA2, MDK, PIK3R2, PRKCA, STAT1, FOSL1, FLRT3, DNM3, TNS3, BCL2L11, MECOM, PPARG, PSMB8, PSMB9, SNAI2, COL4A6, EIF4B, SLC7A5, ITGB6, SULF1, ANXA1, RANBP1, CDC14B, EPAS1, ERLIN2, LY6E, PSCA, LYPD1, IFI6, TP63, CDK2AP2, TGOLN2, CENPF, AURKAIP1</i>                                                                                                                                                               |

**Table S2b. The top ten gene enrichment functions upregulated after PKC $\alpha$  inhibition.**

| Description                               | Term          | Log <sub>10</sub> p-value | Genes                                                                                                                                                                                                                                                                                                                                                           |
|-------------------------------------------|---------------|---------------------------|-----------------------------------------------------------------------------------------------------------------------------------------------------------------------------------------------------------------------------------------------------------------------------------------------------------------------------------------------------------------|
| cellular response to hormone stimulus     | GO:0032870    | -10,80561172              | CA2, EDN1, EPRS1, ESR1, IGF1R, LYN, ENPP1, PIK3R1, PRKCI, PRLR, PTGER4, SGK1, SMARCC1, STC1, UGCG, NCOA4, NCOA3, SOCS2, NR1D2, NCOA2, DDX17, RAB31, ABHD2, LGR4, HADHA, IGFBP5, TXNIP, ATRX, CDH1, DHX9, MDM2, HSP90B1, EZR, GNA14, ACTR2                                                                                                                       |
| Protein phosphorylation                   | GO:0006468    | -8,673680111              | CDC42, EDN1, EPHA7, ERBB4, IGF1R, LYN, SMAD5, CDK17, PIK3R1, PRKAB2, PRKCI, PRLR, RET, BRD2, SGK1, STK3, DYRK2, CDC42BPA, CPNE3, ULK2, HIPK3, MAP3K2, SMG1, SCYL2, WNK1, HIPK1, EFNB2, GFRA1, PDGFA, SMARCC1, SOCS2, TXNIP, CALM1, PRKAR2B, PTPRO, SH3BP5, CHP1, GPR37, NPY5R, RAP2A, EZR, PJA2, GPNMB, ITCH, RHOB, IGFBP5, SEMA3C, RUFY3, ZNF609, EIF4G1, FXR1 |
| Regulation of cellular response to stress | GO:0080135    | -8,118345022              | CDC42, DHX9, EIF4G1, GPR37, IGF1R, LYN, MDM2, MUC1, PIK3R1, RAP2A, STK3, EZR, FXR1, THOC5, BAG5, BCLAF1, PJA2, ACTR2, HIPK3, AGR2, SERINC3, SMG1, UFL1, OXR1, ITCH                                                                                                                                                                                              |
| Intracellular protein transport           | GO:0006886    | -7,841428472              | TRIM23, RHOB, COPA, HSPA4, KIF5C, KPNA1, MYO6, PIK3R1, PRKCI, RAB6A, STK3, TPR, HSP90B1, NCOA4, USO1, TXNIP, RAB31, CHP1, SNX13, RFTN1, FAF2, SYTL2, SNX16, SNX27                                                                                                                                                                                               |
| Regulation of cellular localization       | GO:0060341    | -7,62597202               | APOD, CALM1, CDC42, CDH1, DHX9, ERBB4, GLUL, LCP1, LMAN1, LYN, PPP1R12A, PIK3R1, PPM1A, PRKCI, TCF7L2, TPR, EZR, PICALM, TCAF1, LYPLA1, AGR2, CHP1, RUFY3, GPD1L, NMD3, PARD6B, UNC13B, RET, NCOA4, MDM2, SOS2, IGF1R, PDGFA                                                                                                                                    |
| Pathways in cancer                        | hsa05200      | -7,560140801              | ADCY1, CALM1, RUNX1T1, CDC42, CDH1, EDN1, ESR1, IGF1R, MDM2, PDGFA, PIK3R1, PLCB4, PTGER4, RET, SOS2, TCF7L2, TPR, HSP90B1, NCOA4, NCOA3, GNA13, KCNJ3, NCOA2, PRKCI, PARD6B, DIO1, MAP3K2, KPNA1, UGT2B15, GLUL, SLC38A1, LYN, SOCS2, CANX                                                                                                                     |
| Neuron projection development             | GO:0031175    | -7,478233099              | ADCY1, ALCAM, APOD, CDC42, CDH1, EDN1, EFNB2, EPHA7, GFRA1, GPR37, IGF1R, KIF5C, LYN, NRCAM, PTPRO, RET, SGK1, PICALM, ULK2, SEMA3C, DICER1, LRP12, PARD6B, PIK3R1, PRKCI, TWF1, RAP2A, RNF6, EZR, FXR1, BAG5, ACTR2, RUFY3, TANC2, OCLN, STC1, CAP2, ATRNL1, RHOB, EIF4G1, SOS2, ST8SIA4, PSME4, PDGFA, PIP5K1A, GPNMB                                         |
| RHO gtpase cycle                          | R-HSA-9012999 | -7,348083355              | RHOB, CDC42, LMAN1, MYO6, PCDH7, PIK3R1, TWF1, SOS2, PICALM, CDC42BPA, PKP4, SLC4A7, SRRM1, GNA13, SPEN, FAF2, FAM169A, TOR1AIP1, PARD6B, CALM1, CDH1, PPP1R12A, ACTR2, NCOA2                                                                                                                                                                                   |
| Regulation of growth                      | GO:0040008    | -7,224419959              | CDC42, EDN1, EIF4G1, EPHA7, ERBB4, FHL1, IGFBP5, NPY1R, NRCAM, ENPP1, RNF6, SELENOP, SGK1, STK3, EZR, SOCS2, ULK2, SEMA3C, AGR2, RUFY3, RFTN1, LRP12, ITCH, EFNB2, PTPRO, BAG5, CLCN3, RET, APOD, ATRX, PIK3R1, PPM1A, PTGER4, TWF1, RAD21, TPR, PICALM, ID4, DICER1, RUNX1T1, LYN, SPDEF, RC3H2                                                                |
| Signal transduction by p53 class mediator | GO:0072331    | -6,987347799              | ATRX, CASP2, MDM2, MDM4, MUC1, MYO6, DYRK2, USP10, HIPK1, LYN, PIK3R1, RAD21, SGK1, SMG1, SMC5, PSME4, UFL1, WAC, UBE2W, ZBTB38, FHL1, GPNMB, TPR, EIF4G1, RRN3, RHOB, CALM1, ID4, MYBL1, PPP1R12A, CDK17, STAG2, RET, STK3, TCF7L2, BAG5, BCLAF1, SERINC3, CDC42, EDN1, THOC5                                                                                  |

**Table S3. Effect of different drugs on proliferation of MCF-7 cells.**

| DRUG              | Time | PKC $\alpha$ -WT MCF-7<br>DNA fold Change $\pm$<br>SD | % Inhibition Ctrl w/o<br>drug (PKC $\alpha$ -WT MCF-<br>7) vs PKC $\alpha$ -WT MCF-7 | PKC $\alpha$ -KO MCF-7<br>DNA fold Change<br>$\pm$ SD | % Inhibition Ctrl w/o<br>drug (PKC $\alpha$ -WT MCF-7)<br>vs PKC $\alpha$ -KO MCF-7 |
|-------------------|------|-------------------------------------------------------|--------------------------------------------------------------------------------------|-------------------------------------------------------|-------------------------------------------------------------------------------------|
| Ctrl w/o drug     | Day1 | 1,01 $\pm$ 0,06                                       | -----                                                                                | 1,02 $\pm$ 0,05                                       | -0,59                                                                               |
|                   | Day2 | 1,38 $\pm$ 0,09                                       | -----                                                                                | 1,30 $\pm$ 0,14                                       | 5,80                                                                                |
|                   | Day3 | 2,07 $\pm$ 0,26                                       | -----                                                                                | 1,44 $\pm$ 0,29                                       | 30,42                                                                               |
|                   | Day4 | 2,45 $\pm$ 0,50                                       | -----                                                                                | 1,55 $\pm$ 0,23                                       | 36,72                                                                               |
|                   | Day5 | 2,91 $\pm$ 0,61                                       | -----                                                                                | 1,78 $\pm$ 0,46                                       | 38,98                                                                               |
|                   | Day6 | 4,29 $\pm$ 0,81                                       | -----                                                                                | 2,24 $\pm$ 0,66                                       | 47,83                                                                               |
|                   | Day7 | 4,60 $\pm$ 1,12                                       | -----                                                                                | 2,65 $\pm$ 1,15                                       | 42,28                                                                               |
|                   | Day8 | 5,51 $\pm$ 1,04                                       | -----                                                                                | 3,00 $\pm$ 1,51                                       | 45,52                                                                               |
|                   |      |                                                       |                                                                                      |                                                       |                                                                                     |
| U73122 1 $\mu$ M  | Day1 | 0,96 $\pm$ 0,04                                       | 5,08                                                                                 | 0,98 $\pm$ 0,07                                       | 3,60                                                                                |
|                   | Day2 | 1,4 $\pm$ 0,15                                        | -1,38                                                                                | 1,13 $\pm$ 0,06                                       | 17,70                                                                               |
|                   | Day3 | 2,05 $\pm$ 0,22                                       | 1,26                                                                                 | 1,02 $\pm$ 0,09                                       | 50,87                                                                               |
|                   | Day4 | 2,56 $\pm$ 0,32                                       | -4,24                                                                                | 1,11 $\pm$ 0,05                                       | 54,92                                                                               |
|                   | Day5 | 3,26 $\pm$ 0,24                                       | -11,94                                                                               | 1,5 $\pm$ 0,15                                        | 48,45                                                                               |
|                   | Day6 | 5,08 $\pm$ 0,19                                       | -18,55                                                                               | 1,43 $\pm$ 0,07                                       | 66,57                                                                               |
|                   | Day7 | 5,61 $\pm$ 0,11                                       | -22,05                                                                               | 2,18 $\pm$ 0,21                                       | 52,59                                                                               |
|                   | Day8 | 6,41 $\pm$ 0,23                                       | -16,32                                                                               | 2,64 $\pm$ 0,15                                       | 52,05                                                                               |
|                   |      |                                                       |                                                                                      |                                                       |                                                                                     |
| U73122 10 $\mu$ M | Day1 | 0,99 $\pm$ 0,1                                        | 2,61                                                                                 | 1,04 $\pm$ 0,14                                       | -2,32                                                                               |
|                   | Day2 | 1,38 $\pm$ 0,12                                       | -0,29                                                                                | 1,17 $\pm$ 0,04                                       | 14,97                                                                               |
|                   | Day3 | 1,7 $\pm$ 0,09                                        | 18,03                                                                                | 1,01 $\pm$ 0,06                                       | 51,23                                                                               |
|                   | Day4 | 1,66 $\pm$ 0,13                                       | 32,27                                                                                | 1,03 $\pm$ 0,05                                       | 57,87                                                                               |

|                   |      |             |       |             |       |
|-------------------|------|-------------|-------|-------------|-------|
|                   | Day5 | 2,08 ± 0,34 | 28,52 | 1,04 ± 0,07 | 64,26 |
|                   | Day6 | 2,79 ± 0,34 | 35,01 | 0,78 ± 0,05 | 81,80 |
|                   | Day7 | 2,32 ± 0,85 | 49,55 | 0,84 ± 0,03 | 81,79 |
|                   | Day8 | 3,49 ± 0,36 | 36,56 | 0,83 ± 0,1  | 84,93 |
|                   |      |             |       |             |       |
| KT5720 0,1 µM     | Day1 | 1,02 ± 0,04 | -0,10 | 1,02 ± 0,08 | -0,84 |
|                   | Day2 | 1,15 ± 0,07 | 16,61 | 1 ± 0,03    | 27,51 |
|                   | Day3 | 2,22 ± 0,14 | -7,07 | 1,12 ± 0,07 | 45,80 |
|                   | Day4 | 2,17 ± 0,1  | 11,57 | 0,9 ± 0,07  | 63,48 |
|                   | Day5 | 2,65 ± 0,17 | 9,11  | 1,24 ± 0,05 | 57,47 |
|                   | Day6 | 3,66 ± 0,12 | 14,59 | 1,19 ± 0,1  | 72,35 |
|                   | Day7 | 4,07 ± 0,17 | 11,55 | 1,83 ± 0,05 | 60,21 |
|                   | Day8 | 4,92 ± 0,21 | 10,74 | 2,14 ± 0,1  | 61,14 |
|                   |      |             |       |             |       |
| KT5720 1 µM       | Day1 | 0,98 ± 0,08 | 3,11  | 0,96 ± 0,07 | 5,82  |
|                   | Day2 | 1,25 ± 0,05 | 9,52  | 1,06 ± 0,05 | 23,33 |
|                   | Day3 | 2,18 ± 0,14 | -5,38 | 1,28 ± 0,06 | 38,19 |
|                   | Day4 | 2,21 ± 0,06 | 9,73  | 1,1 ± 0,07  | 55,32 |
|                   | Day5 | 2,69 ± 0,12 | 7,73  | 1,27 ± 0,06 | 56,27 |
|                   | Day6 | 3,53 ± 0,15 | 17,56 | 1,37 ± 0,09 | 68,14 |
|                   | Day7 | 3,91 ± 0,07 | 14,92 | 1,87 ± 0,18 | 59,28 |
|                   | Day8 | 4,55 ± 0,19 | 17,46 | 2,01 ± 0,12 | 63,50 |
|                   |      |             |       |             |       |
| BMS 599626 0,1 µM | Day1 | 0,93 ± 0,04 | 8,53  | 0,94 ± 0,1  | 7,79  |
|                   | Day2 | 1,31 ± 0,09 | 5,16  | 0,96 ± 0,21 | 30,41 |
|                   | Day3 | 1,73 ± 0,27 | 16,47 | 1,35 ± 0,17 | 34,81 |

|                 |      |             |       |             |       |
|-----------------|------|-------------|-------|-------------|-------|
|                 | Day4 | 2,2 ± 0,22  | 10,34 | 1,4 ± 0,05  | 42,88 |
|                 | Day5 | 2,2 ± 0,06  | 24,40 | 1,67 ± 0,21 | 42,78 |
|                 | Day6 | 2,47 ± 0,18 | 42,30 | 2,01 ± 0,18 | 53,21 |
|                 | Day7 | 2,54 ± 0,14 | 44,82 | 1,96 ± 0,31 | 57,38 |
|                 | Day8 | 2,49 ± 0,2  | 54,78 | 2,03 ± 0,3  | 63,09 |
|                 |      |             |       |             |       |
| BMS 599626 1 µM | Day1 | 0,92 ± 0,28 | 9,02  | 0,99 ± 0,14 | 2,37  |
|                 | Day2 | 1,24 ± 0,22 | 9,88  | 1,08 ± 0,13 | 21,69 |
|                 | Day3 | 1,72 ± 0,35 | 16,95 | 1,27 ± 0,36 | 38,92 |
|                 | Day4 | 2,26 ± 0,29 | 7,89  | 1,38 ± 0,04 | 43,70 |
|                 | Day5 | 2,35 ± 0,29 | 19,42 | 1,36 ± 0,23 | 53,35 |
|                 | Day6 | 2,52 ± 0,09 | 41,31 | 1,75 ± 0,4  | 59,28 |
|                 | Day7 | 2,31 ± 0,12 | 49,71 | 1,95 ± 0,13 | 57,70 |
|                 | Day8 | 2,45 ± 0,27 | 55,55 | 1,99 ± 0,21 | 63,95 |
|                 |      |             |       |             |       |
|                 |      |             |       |             |       |
| BMS 599626 5 µM | Day1 | 0,99 ± 0,05 | 2,37  | 0,96 ± 0,04 | 5,08  |
|                 | Day2 | 1,26 ± 0,08 | 8,43  | 1,08 ± 0,04 | 21,88 |
|                 | Day3 | 1,6 ± 0,11  | 22,98 | 1,32 ± 0,09 | 36,14 |
|                 | Day4 | 1,51 ± 0,18 | 38,39 | 1,24 ± 0,24 | 49,41 |
|                 | Day5 | 1,73 ± 0,07 | 40,55 | 1,34 ± 0,09 | 54,12 |
|                 | Day6 | 1,64 ± 0,09 | 61,84 | 1,12 ± 0,22 | 73,92 |
|                 | Day7 | 2,05 ± 0,11 | 55,48 | 1,49 ± 0,15 | 67,60 |
|                 | Day8 | 2,01 ± 0,07 | 63,59 | 1,57 ± 0,34 | 71,49 |
|                 |      |             |       |             |       |
|                 |      |             |       |             |       |



|                  |      |             |       |             |       |
|------------------|------|-------------|-------|-------------|-------|
| BMS 599626 10 µM | Day1 | 1 ± 0,08    | 1,63  | 1,05 ± 0,05 | -3,80 |
|                  | Day2 | 1,16 ± 0,1  | 15,70 | 1,11 ± 0,06 | 19,15 |
|                  | Day3 | 1,34 ± 0,17 | 35,42 | 1,19 ± 0,14 | 42,42 |
|                  | Day4 | 1,22 ± 0,15 | 50,12 | 0,92 ± 0,31 | 62,57 |
|                  | Day5 | 1,24 ± 0,08 | 57,47 | 1,13 ± 0,05 | 61,08 |
|                  | Day6 | 1,04 ± 0,06 | 75,79 | 0,79 ± 0,2  | 81,51 |
|                  | Day7 | 1,11 ± 0,19 | 75,97 | 0,66 ± 0,12 | 85,70 |
|                  | Day8 | 0,99 ± 0,34 | 82,08 | 0,41 ± 0,13 | 92,55 |
|                  |      |             |       |             |       |
| Imatinib 1 µM    | Day1 | 1,01 ± 0,04 | 0,15  | 0,98 ± 0,07 | 3,60  |
|                  | Day2 | 1,22 ± 0,07 | 11,16 | 1,13 ± 0,06 | 17,70 |
|                  | Day3 | 1,51 ± 0,07 | 27,09 | 1,02 ± 0,09 | 50,87 |
|                  | Day4 | 1,77 ± 0,11 | 27,68 | 1,11 ± 0,05 | 54,92 |
|                  | Day5 | 2,82 ± 0,06 | 3,26  | 1,5 ± 0,15  | 48,45 |
|                  | Day6 | 2,71 ± 0,07 | 36,81 | 1,43 ± 0,07 | 66,57 |
|                  | Day7 | 3,68 ± 0,26 | 20,08 | 2,18 ± 0,21 | 52,59 |
|                  | Day8 | 3,24 ± 0,06 | 41,20 | 2,64 ± 0,15 | 52,05 |
|                  |      |             |       |             |       |
| Imatinib 10 µM   | Day1 | 1,03 ± 0,03 | -1,58 | 1,04 ± 0,14 | -2,32 |
|                  | Day2 | 1,16 ± 0,08 | 15,88 | 1,17 ± 0,04 | 14,97 |
|                  | Day3 | 1,25 ± 0,03 | 39,52 | 1,01 ± 0,06 | 51,23 |
|                  | Day4 | 1,46 ± 0,05 | 40,43 | 1,03 ± 0,05 | 57,87 |
|                  | Day5 | 2 ± 0,14    | 31,44 | 1,04 ± 0,07 | 64,26 |
|                  | Day6 | 2,01 ± 0,09 | 53,21 | 0,78 ± 0,05 | 81,80 |
|                  | Day7 | 2,55 ± 0,06 | 44,49 | 0,84 ± 0,03 | 81,79 |
|                  | Day8 | 2,94 ± 0,28 | 46,59 | 0,83 ± 0,10 | 84,98 |

**Table S4. Effect of different drugs on migration of MCF-7 cells.**

| DRUG               | Time | PKC $\alpha$ -WT MCF-7 migration (%) $\pm$ SD | % Inhibition vs Ctrl w/o drug (PKC $\alpha$ -WT MCF-7) on PKC $\alpha$ -KO MCF-7 | PKC $\alpha$ -KO MCF-7 migration (%) $\pm$ SD | % Inhibition vs Ctrl w/o drug (PKC $\alpha$ -WT MCF-7) on PKC $\alpha$ -KO MCF-7 |
|--------------------|------|-----------------------------------------------|----------------------------------------------------------------------------------|-----------------------------------------------|----------------------------------------------------------------------------------|
| Ctrl w/o drug      | 8h   | 14,08 $\pm$ 5,04                              | -----                                                                            | 5,46 $\pm$ 4,20                               | 63,16                                                                            |
|                    | 24h  | 41,76 $\pm$ 5,62                              | -----                                                                            | 10,84 $\pm$ 5,34                              | 74,05                                                                            |
|                    | 48h  | 69,59 $\pm$ 5,04                              | -----                                                                            | 26,99 $\pm$ 4,90                              | 61,21                                                                            |
|                    | 72h  | 95,44 $\pm$ 6,78                              | -----                                                                            | 44,06 $\pm$ 4,77                              | 53,84                                                                            |
| U73122 1 $\mu$ M   | 8h   | 8,51 $\pm$ 4,58                               | 42,60                                                                            | 0,47 $\pm$ 5,09                               | 96,76                                                                            |
|                    | 24h  | 31,29 $\pm$ 6,44                              | 25,07                                                                            | 7,89 $\pm$ 7,16                               | 81,08                                                                            |
|                    | 48h  | 54,44 $\pm$ 7,11                              | 21,77                                                                            | 14,14 $\pm$ 13,72                             | 79,67                                                                            |
|                    | 72h  | 80,56 $\pm$ 14,17                             | 15,59                                                                            | 22,53 $\pm$ 10,02                             | 76,39                                                                            |
| U73122 10 $\mu$ M  | 8h   | 4,18 $\pm$ 3,08                               | 71,79                                                                            | 0,54 $\pm$ 2,12                               | 96,35                                                                            |
|                    | 24h  | 16,36 $\pm$ 9,17                              | 60,82                                                                            | -0,28 $\pm$ 4,33                              | 100,66                                                                           |
|                    | 48h  | 21,35 $\pm$ 6,13                              | 69,32                                                                            | 6,38 $\pm$ 3,57                               | 90,83                                                                            |
|                    | 72h  | 44,85 $\pm$ 9,46                              | 53,01                                                                            | 10,50 $\pm$ 7,16                              | 89,00                                                                            |
| KT5720 0,1 $\mu$ M | 8h   | 15,96 $\pm$ 4,73                              | -7,70                                                                            | 1,99 $\pm$ 3,72                               | 86,55                                                                            |
|                    | 24h  | 44,37 $\pm$ 8,03                              | -6,25                                                                            | 5,91 $\pm$ 2,92                               | 85,84                                                                            |
|                    | 48h  | 58,41 $\pm$ 5,64                              | 16,06                                                                            | 6,29 $\pm$ 3,05                               | 90,96                                                                            |
|                    | 72h  | 94,57 $\pm$ 7,92                              | 0,92                                                                             | 12,57 $\pm$ 5,62                              | 86,83                                                                            |
| KT5720 1 $\mu$ M   | 8h   | 7,16 $\pm$ 4,7                                | 51,69                                                                            | 3,62 $\pm$ 2,65                               | 75,57                                                                            |
|                    | 24h  | 27,17 $\pm$ 5,94                              | 34,95                                                                            | 4,59 $\pm$ 2,97                               | 89,01                                                                            |

|                   |     |              |        |              |       |
|-------------------|-----|--------------|--------|--------------|-------|
|                   | 48h | 42,71 ± 6,46 | 38,63  | 6,54 ± 3,86  | 90,60 |
|                   | 72h | 65,65 ± 5,69 | 31,21  | 11,97 ± 4,13 | 87,46 |
|                   |     |              |        |              |       |
| BMS 599626 0,1 µM | 8h  | 10,41 ± 3,55 | 29,78  | 3,37 ± 2,90  | 77,29 |
|                   | 24h | 29,94 ± 3,65 | 28,32  | 7,22 ± 5,24  | 82,72 |
|                   | 48h | 54,75 ± 5,58 | 21,32  | 13,43 ± 4,02 | 80,70 |
|                   | 72h | 71,66 ± 4,64 | 24,92  | 22,03 ± 5,18 | 76,91 |
|                   |     |              |        |              |       |
| BMS 599626 1 µM   | 8h  | 9,00 ± 3,99  | 39,26  | 3,20 ± 3,06  | 78,44 |
|                   | 24h | 25,18 ± 4,67 | 39,71  | 7,06 ± 3,78  | 83,09 |
|                   | 48h | 49,91 ± 4,92 | 28,27  | 16,63 ± 4,71 | 76,10 |
|                   | 72h | 63,69 ± 3,74 | 33,27  | 18,56 ± 5,24 | 80,56 |
|                   |     |              |        |              |       |
| Imatinib 1 µM     | 8h  | 15,64 ± 4,38 | -5,54  | 5,44 ± 2,95  | 63,32 |
|                   | 24h | 48,90 ± 4,61 | -17,10 | 19,82 ± 4,14 | 52,53 |
|                   | 48h | 81,49 ± 3,05 | -17,11 | 37,87 ± 5,98 | 45,58 |
|                   | 72h | 94,99 ± 7,45 | 0,47   | 56,72 ± 5,19 | 40,57 |
|                   |     |              |        |              |       |
| Imatinib 10 µM    | 8h  | 15,70 ± 4,67 | -5,90  | 3,63 ± 2,48  | 75,51 |
|                   | 24h | 48,92 ± 4,45 | -17,14 | 11,83 ± 4,18 | 71,68 |
|                   | 48h | 68,01 ± 4,36 | 2,26   | 22,28 ± 4,48 | 67,98 |
|                   | 72h | 82,01 ± 4,13 | 14,07  | 29,76 ± 4,33 | 68,82 |

**Table S5. Effect of different drugs on apoptosis of MCF-7 cells.**

| DRUG                   | PKC $\alpha$ -WT MCF-7<br>Effect (%) $\pm$ SD | Effect vs Ctrl no drug<br>(PKC $\alpha$ -WT MCF-7) on<br>PKC $\alpha$ -WT MCF-7 | PKC $\alpha$ -KO MCF-7<br>Effect (%) $\pm$ SD | Effect vs Ctrl no drug<br>(PKC $\alpha$ -WT MCF-7) on<br>PKC $\alpha$ -KO MCF-7 |
|------------------------|-----------------------------------------------|---------------------------------------------------------------------------------|-----------------------------------------------|---------------------------------------------------------------------------------|
| Ctrl no drug           | 7,7 $\pm$ 2,68                                | -----                                                                           | 11,97 $\pm$ 3,84                              | 155,49                                                                          |
| U73122 1 $\mu$ M       | 12,47 $\pm$ 5,31                              | 161,90                                                                          | 13,2 $\pm$ 4,04                               | 171,43                                                                          |
| U73122 10 $\mu$ M      | 26,10 $\pm$ 4,55                              | 338,96                                                                          | 22,47 $\pm$ 6,42                              | 291,77                                                                          |
| U73122 20 $\mu$ M*     | 22,96 $\pm$ N.D                               | 298,18                                                                          | 44,18 $\pm$ N.D                               | 573,77                                                                          |
| KT5720 0,1 $\mu$ M     | 7,87 $\pm$ 1,61                               | 102,16                                                                          | 10,00 $\pm$ 2,23                              | 129,87                                                                          |
| KT5720 1 $\mu$ M       | 7,57 $\pm$ 1,90                               | 98,27                                                                           | 8,63 $\pm$ 1,62                               | 112,12                                                                          |
| KT5720 10 $\mu$ M      | 13,11 $\pm$ 0,53                              | 170,22                                                                          | 14,94 $\pm$ 0,38                              | 194,03                                                                          |
| BMS 599626 0,1 $\mu$ M | 9,87 $\pm$ 1,24                               | 128,14                                                                          | 13,07 $\pm$ 0,31                              | 169,70                                                                          |
| BMS 599626 1 $\mu$ M   | 11,70 $\pm$ 1,61                              | 151,95                                                                          | 14,37 $\pm$ 0,65                              | 186,58                                                                          |
| BMS 599626 20 $\mu$ M* | 33,69 $\pm$ N.D                               | 437,53                                                                          | 49,17 $\pm$ N.D                               | 638,57                                                                          |
| Imatinib 1 $\mu$ M     | 18,73 $\pm$ 5,90                              | 243,29                                                                          | 18,30 $\pm$ 3,01                              | 237,66                                                                          |
| Imatinib 10 $\mu$ M    | 28,90 $\pm$ 5,74                              | 375,32                                                                          | 24,07 $\pm$ 2,35                              | 312,55                                                                          |
| Imatinib 20 $\mu$ M*   | 24,49 $\pm$ N.D                               | 318,05                                                                          | 26,88 $\pm$ N.D                               | 349,09                                                                          |

\*These experiments have been only performed with one biological sample.

Table S7. Oligonucleotide sequences used in qPCR assays.

| RefSeq       | Gene name | Oligonucleotide sequence                                | Concentration (nM) |
|--------------|-----------|---------------------------------------------------------|--------------------|
| NM_002046    | GAPDH     | 5' ACATCGCTCAGACACCATG<br>3' TGTAGTTGAGGTCAATGAAGGG     | 100                |
| NM_002737    | PRKCA     | 5'TCCAGATTATATCGCCCCAGA<br>3' CCGGCAAGCATTTCATACAAC     | 100                |
| NM_001042599 | ERBB4     | 5'CAGATGCTACGGACCTTACG<br>3' AACACATGCTCCACTGTCAT       | 100                |
| NM_001172646 | PLCB4     | 5'AGATCGAAAGTGCTGACCAAG<br>3' GCTCATCTTCTACAGTGACCAG    | 100                |
| NM_002736    | PRKA2B    | 5'CTACAATCACTGCTACCTCTCC<br>3' TCTCTTTTTGGCATTGTTTTTCAC | 100                |
| NM_005228    | EGFR      | 5'CTGCTGCCACAACCAGT<br>3' TTCACATCCATCTGGTACGTG         | 200                |
| NM_000888    | ITGB6     | 5'TGGTGACCCCTGTAACCTA<br>3' AGAACCATCCTTTGAGAAATCTTC    | 100                |
| NM_033023    | PDGFA     | 5'CGTCCGCCAACTTCCTG<br>3' CTCCTGACGTATTCCACCCTT         | 200                |
| NM_001174046 | SPAM1     | 5'GAGACATTGGGTGGCTGGAT<br>3' AGGATTGTTTTTCAAGTTGCATCA   | 200                |
| NM_005213    | CSTA      | 5'ACTAGTCAAGCCTAATGCAACT<br>3' GTGAATTGATAGTCCACGATCCA  | 200                |
